# Supplementary figures and images for: Label-Free Quantification (LFQ) of Fecal Proteins for Potential Pregnancy Detection in Polar Bears
Source: MDPI journal article supplement (doi:10.3390/life12060796), 2022-05-27

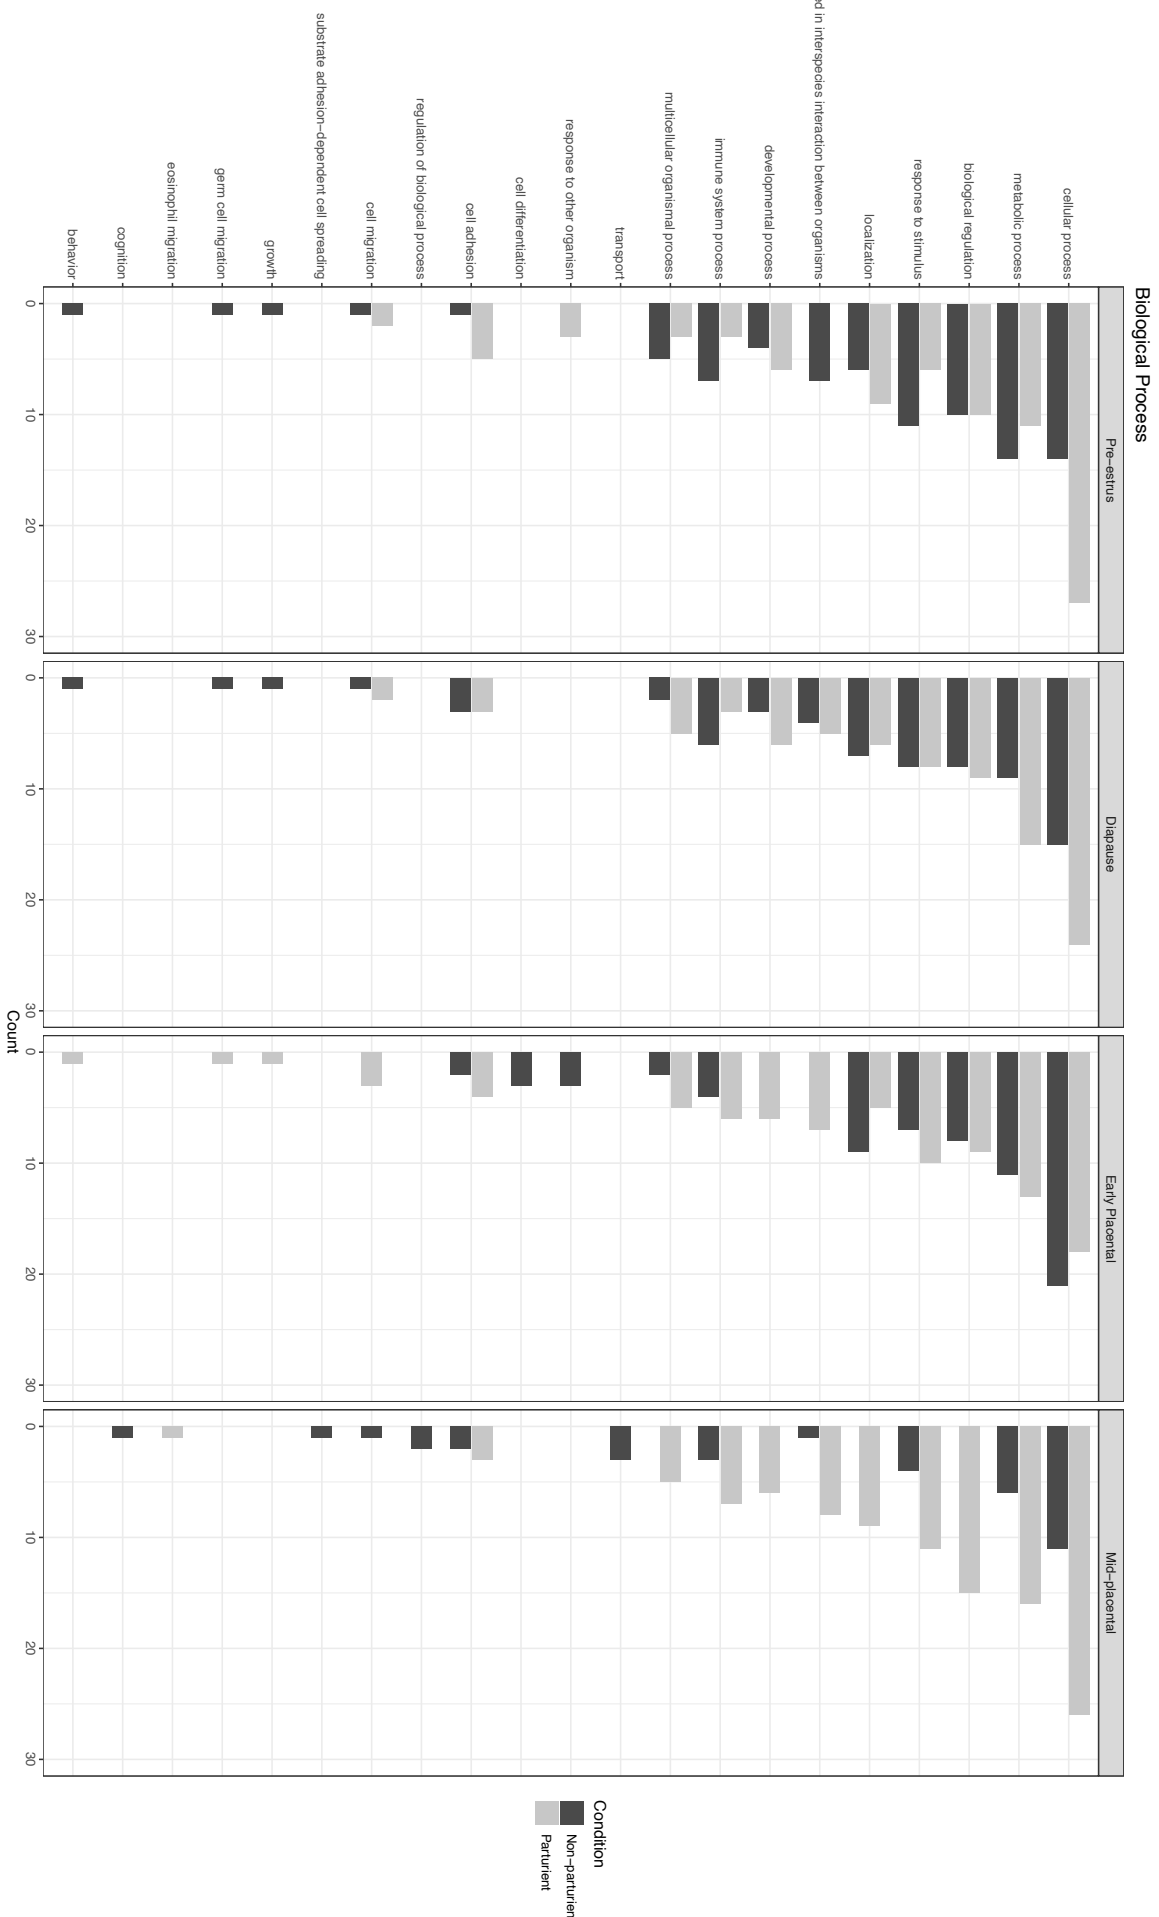

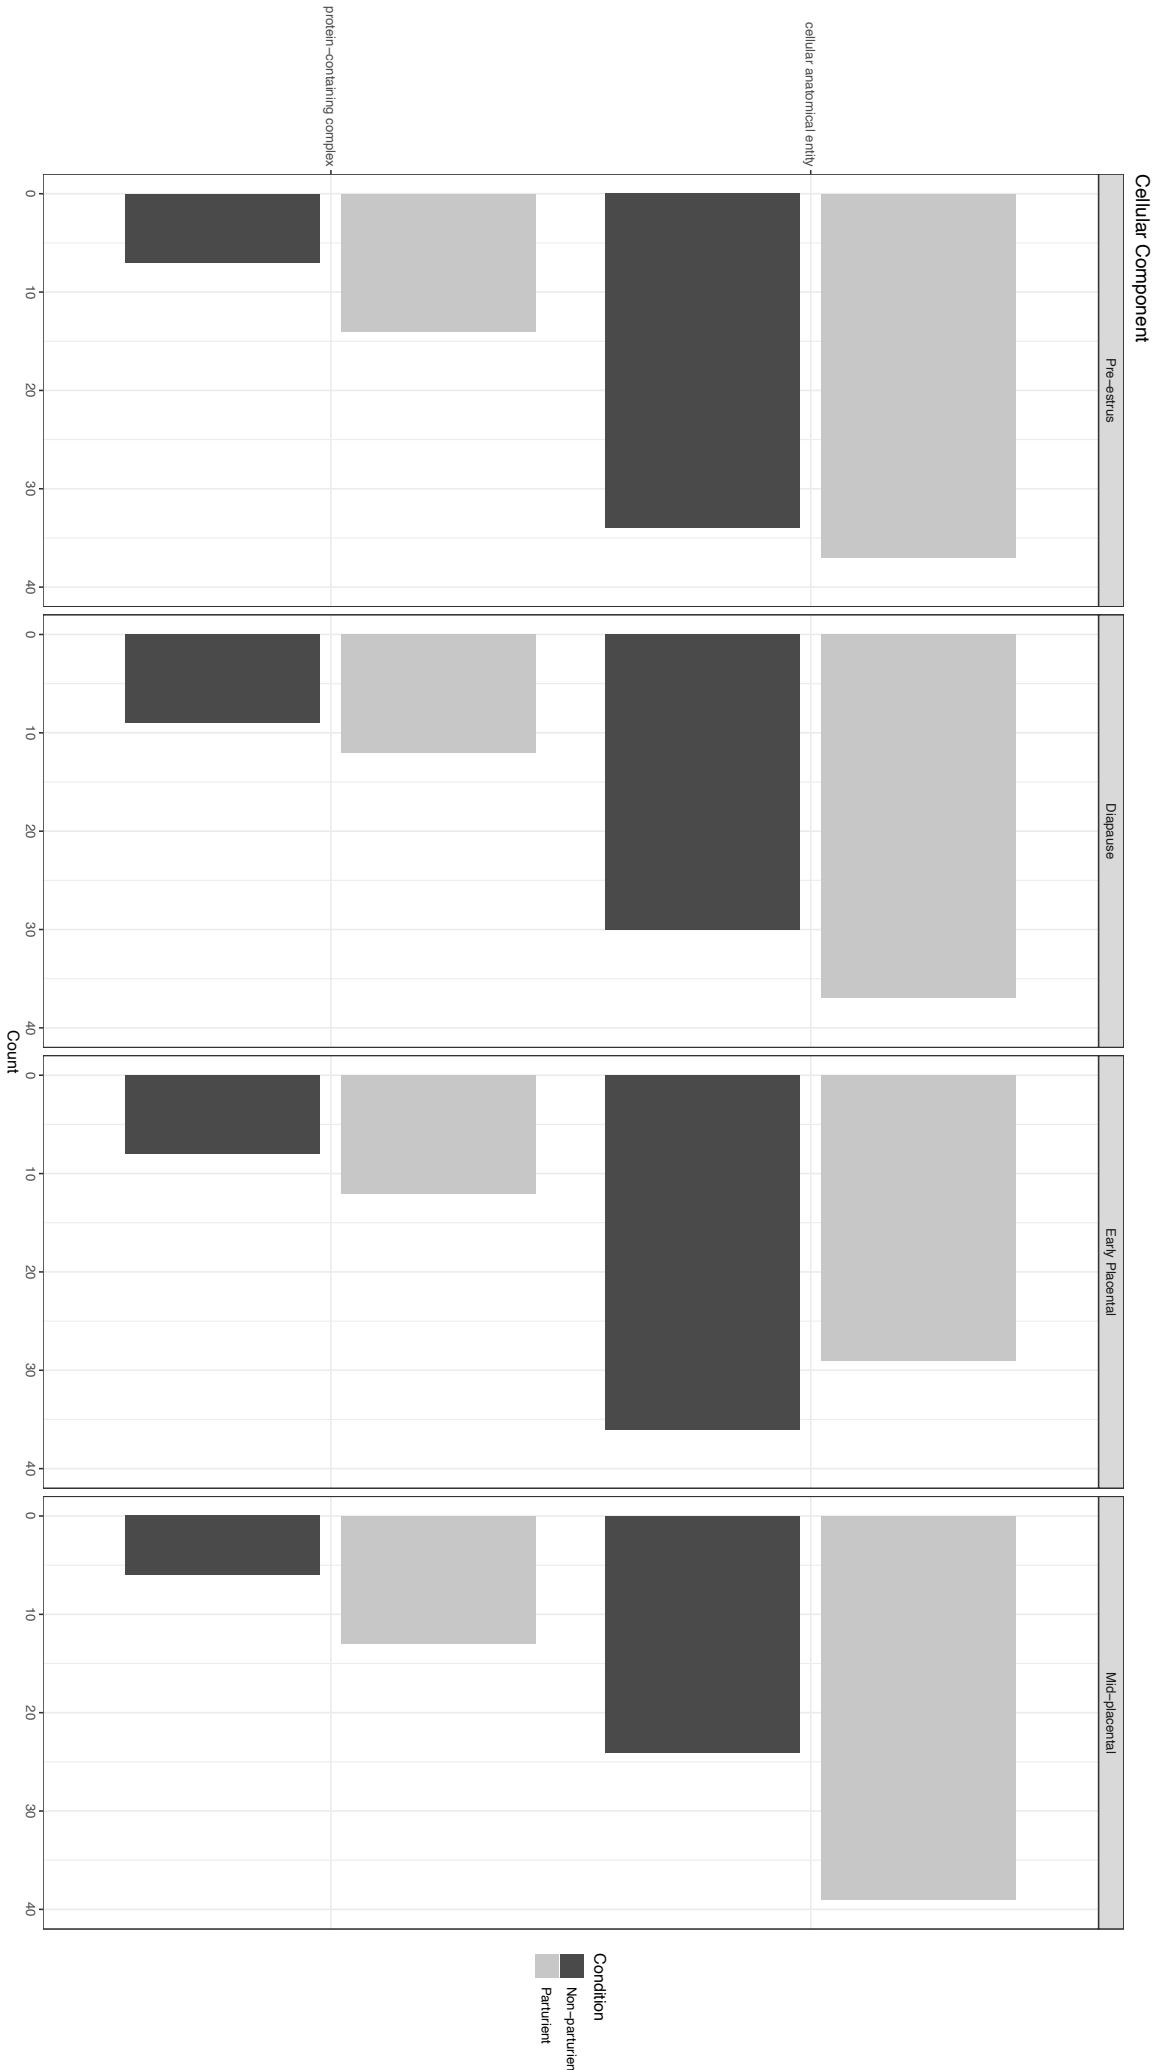

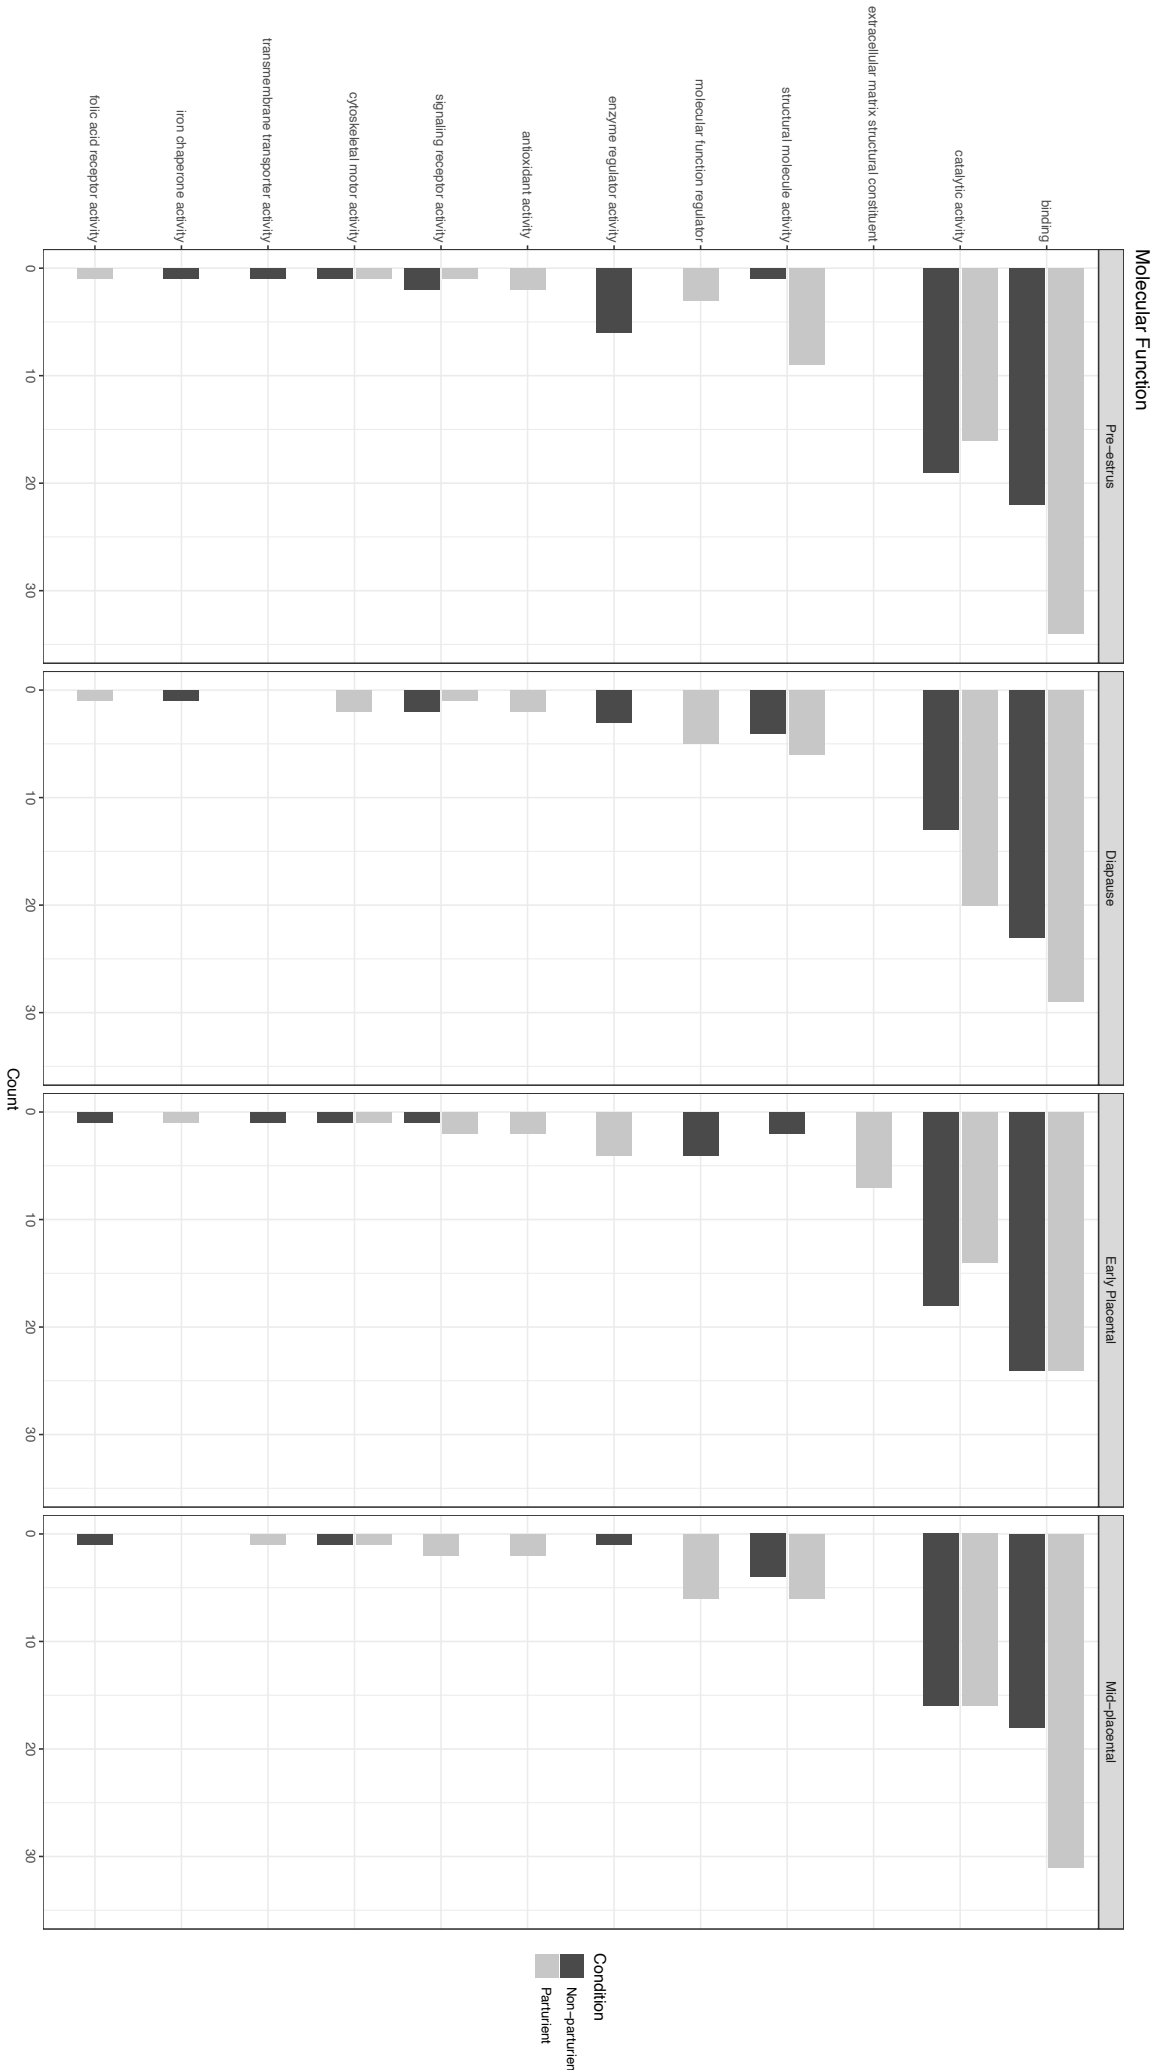

Supplement: s1 [file s1]
